# Supplementary material
Source: MDPI journal article supplement (https://www.mdpi.com/2504-5377/3/1/33)
Supplement: s1 [file s1]

# Development of Cu-modified PVC and PU for catalytic generation of nitric oxide

Liana Azizova <sup>1,\*</sup>, Santanu Ray <sup>2</sup>, Sergey Mikhailovsky <sup>3</sup> and Lyuba Mikhailovska <sup>1</sup>

## Supporting Information:

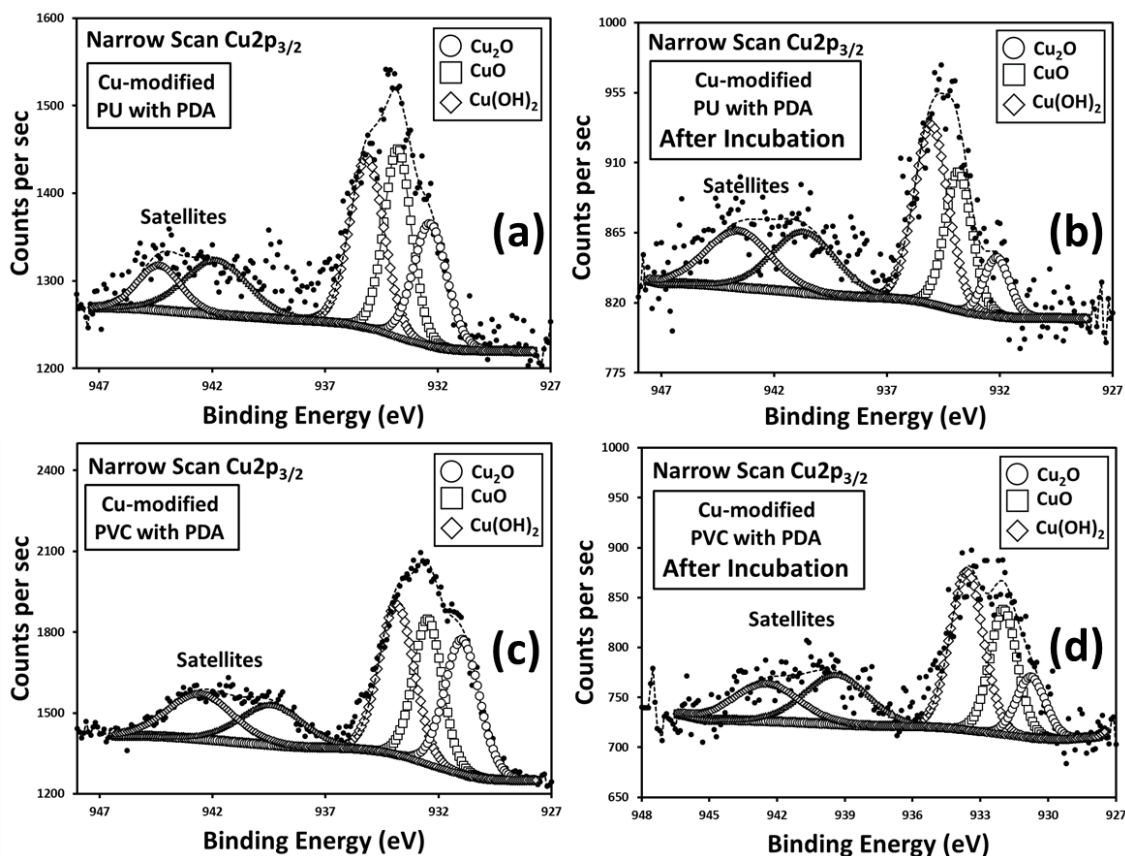

**Figure S1.** Cu<sub>2p<sub>3/2</sub></sub> narrow scan XPS data of four samples, Cu modified poly(vinyl chloride (PVC) and polyurethane (PU) with pDA, before and after incubation. Corresponding peaks are assigned following National Institute of Standards and Technology (NIST) database.
